# Supplementary material for: Pharmacological effects of recombinant human tissue kallikrein on bradykinin B2 receptors
Source: PubMed Central journal article supplement — Pharmacol Res Perspect. 2015 Feb 10;3(2):e00119. doi: 10.1002/prp2.119 (PMC4448978; doi:10.1002/prp2.119), 2015-02-10
Supplement: prp20003-e00119-sd1.pdf [file prp20003-e00119-sd1.pdf]

## Charest-Morin et al.: Supporting Information

### Supplementary Materials and Methods

#### Novel bradykinin (BK) B<sub>2</sub>R vectors

The human B<sub>2</sub>R vector was constructed following the amplification of the entire coding region of the exon 3 part of the human bradykinin B<sub>2</sub>R gene (Leeb-Lundberg et al., 2005; 5'-CGTTTAAACGGGCCCTATGCTCAATGTCACCTTGC-3' was the sense PCR oligonucleotide primer and 5'-TTGGTACCGAGCTCGTCACTGTCTGCTCCCTGC-3' the anti-sense) from the genomic DNA of human umbilical vein endothelial cells extracted as directed using the Trizol reagent (Life Technologies). These primers were derived from Eggerickx et al., (1992). The pcDNA3.1 vector was digested with XbaI and BamHI (Life Technologies) for 2 h at 37°C. Both the PCR product and the plasmid were purified by migration on agarose gels, extracted from the gel using QIAEX II Extraction Kit (Qiagen) and assembled (Gibson Assembly Cloning Kit, New England Biolabs.). The sequence of the properly selected and amplified clone was verified (*Plateforme de Séquençage et de Génotypage, Centre de Recherche du CHU de Québec*). The result of sequencing is shown in Supplementary Fig. 1A and the predicted amino acid sequence, in Supplementary Fig. 1B. The human myc-B<sub>2</sub>R vector was constructed by extracting the hu B<sub>2</sub>R sequence from the hu B<sub>2</sub>R vector using the following primers: 5'-CGTTTAAACGGGCCCTATGGAGCAGAACTCATCTCAGAAGAGGATCTCAATGTCACCTTGCAAGG-3' (sense) and

5'-TTGGTACCGAGCTCGTCACTGTCTGCTCCCTGC-3' (antisense). The pcDNA3.1 was digested with XbaI and BamHI, extracted from agarose gel, assembled and analyzed precisely as described above.

Rat DNA was isolated from a primary culture of Leydig cells (kind gift from Dr. Jacques Tremblay, CHU de Québec) using the QIAamp DNA Blood kit (Qiagen). The rat B<sub>2</sub>R vector was constructed following the amplification of the entire coding region of the exon 3 part of the bradykinin B<sub>2</sub>R gene (McEachern et al., 1991; 5'-

CGTTTAAACGGGCCCTATGTTCAACATCACCACGCAAG -3' was the sense PCR oligonucleotide primer and 5'- TTGGTACCGAGCTCGTCACTGCTTGTTCCTCCCGC -3' the anti-sense) from the rat genomic DNA. For the rat myc-B<sub>2</sub>R construction, the following primers were used: 5'-

CGTTTAAACGGGCCCTATGGAGCAGAACTCATCTCAGAAGAGGATCTGATGTTCAA  
CATCACCACGCAAG - 3' (sense) and 5' -

TTGGTACCGAGCTCGTCACTGCTTGTTCCTCCCGC - 3'. The pcDNA3.1 vector was digested with XbaI and BamHI (Life Technologies) for 2 h at 37°C. Both PCR product and the plasmid were purified by migration on agarose gels, extracted and assembled precisely as outlined above. Both rat B<sub>2</sub>R and rat myc-B<sub>2</sub>R vectors have been sequenced (Supplementary Fig. 2, A-B).

The B<sub>2</sub>R coding sequences from conserved exon 3 are fully functional in various mammalian species; all possess a functional start codon initiating the synthesis of a GPCR with an N-terminal extracellular domain (McEachern et al., 1991; Eggerickx et al., 1992; Bachvarov et al., 1995), but they lack a codon start present in exon 2 that determines a further N-terminal extension of 27

amino acids in the human sequence (AbdAlla et al., 1996). Thus, the present myc-B<sub>2</sub>R constructs lack this extension.

### **Supplementary references**

AbdAlla S, Godovac-Zimmermann J, Braun A, Roscher AA, Müller-Esterl W, Quitterer U (1996). Structure of the bradykinin B<sub>2</sub> receptors' amino terminus. *Biochemistry* 35: 7514-7519.

Bachvarov DR, Saint-Jacques E, Larrivée JF, Levesque L, Rioux F, Drapeau G, Marceau F (1995). Cloning and pharmacological characterization of the rabbit bradykinin B<sub>2</sub> receptor. *J Pharmacol Exp Ther* 275: 1623-1630.

Eggerickx D, Raspe E, Bertrand D, Vassart G, Parmentier M (1992). Molecular cloning, functional expression and pharmacological characterization of a human bradykinin B<sub>2</sub> receptor gene. *Biochem Biophys Res Commun* 187: 1306-1313.

McEachern AE, Shelton ER, Bhakta S, Obernolte R, Bach C, Zuppan P, Fujisaki J, Aldrich RW, Jarnagin K (1991). Expression cloning of a rat B<sub>2</sub> bradykinin receptor. *Proc Natl Acad Sci USA* 88: 7724-7728.

### A. Coding sequence inserted into the hu myc-B<sub>2</sub>R vector

```

ATGCTCAATGTCACCTTGAAGGGCCCACTCTTAACGGGACCTTTGCCAGAGCAAATGCCCCCAAGTG
GAGTGGCTGGGCTGGCTCAACACCATCCAGCCCCCTTCTCTGGGTGCTGTTTCGTGCTGGCCACCCT
AGAGAACATCTTTGTCTCAGCGTCTTCTGCCTGCACAAGAGCAGCTGCACGGTGGCAGAGATCTACCT
GGGGAACCTGGCCGACGACAGCTGATCCTGGCCTGCGGGCTGCCCTTCTGGGCCATCACCATCTCCA
ACAACCTCGACTGGCTCTTTGGGGAGACGCTCTGCCGCGTGGTGAATGCCATTATCTCCATGAACCTGT
ACAGCAGCATCTGTTTCCTGATGCTGGTGAACATCGACCGCTACCTGGCCCTGGTGAACACCATGTCCA
TGGGCCGGATGCGCGGGCTGCGCTGGGCCAAGCTCTACAGCTTGGTGATCTGGGGGTGTACGCTGCT
CCTGAGCTCACCATGCTGGTGTTCGGACCATGAAGGAGTACAGCGATGAGGGCCACAACGTCACCG
CTTGTGTCATCAGTACCATCCCTCATCTGGGAAGTGTTCACCAACATGCTCCTGAATGTCGTGGGCTT
CCTGCTGCCCTGAGTGTATCACCCTTCTGCACGATGCAGATCATGCAGGTGCTGCGGAACAACGAGAT
GCAGAAGTTCAAGGAGATCCAGACGGAGAGGGGCCACGGTGCTAGTCTGGTTGTGCTGCTGCTAT
TCATCATCTGCTGGCTGCCCTTCCAGATCAGCACCTTCTGGATACGCTGCATCGCCTCGGCATCCTCT
CCAGTCTGCCAGGACGAGCGCATCATCGATGTAATCACACAGATCGCTCCTTCATGGCCTACAGCAA
GCTGCCTCAACCCACTGGTGTACGTGATCGTGGCAAGCGCTTCCGAAAGAAGTCTTGGGAGGTGTAC
CAGGGAGTGTGCCAGAAAGGGGGCTGCAGGTCAGAACCCATTGAGTGGAGAACTCCATGGGCACACT
CGCGACCTCCATCTCCGTGGAACGCCAGATTCAAACTGCAGGACTGGGCAGGGAGCAGACAGTGA

```

### B. Translation, hu myc-B<sub>2</sub>R

```

MEQKLISEEDLNVTLQGPPTLNGTFAQSKCPQVEWLGWLNITQPPFLWVLFV
LATLENIFVLSVFLHKSSCTVAEIYLGNLAAADLILACGLPFWAITISNFD
WLFGETLCRVVNAIISMNLYSSICFLMLVSDRYLALVKTMSMGRMRGVRWA
KLYSLVIWGCSTLLSSPMLVFRMTKEYSDEGHNVTAQVISYPSLIWEVFTNM
LLNVVGFLLPLSVITFCTMQIMQVLRNEMQKFKEIQTERRATVLLVLLLF
IICWLPFQISTFLDLHLRLGILSSCQDERIIDVITQIASFMAYSNSCLNPLVYVI
VGKRFRRKKSWEVYQGVQCQKGGCRSEPIQMENSMTLRTSISVERQIHKLQD
WAGSRQ Stop

```

### C. Expression

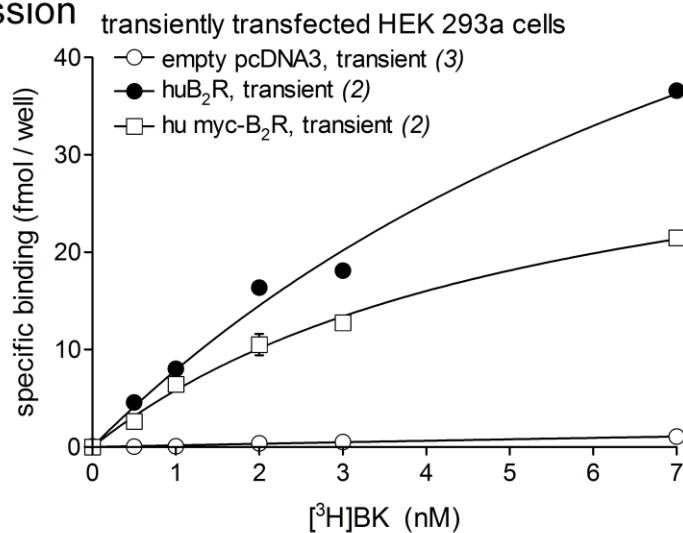

Supplementary figure 1. Validation of novel human B<sub>2</sub>R vectors. A. Coding DNA sequence inserted into the hu B<sub>2</sub>R vector based on the pcDNA3.1 vector, as determined by post-hoc sequencing. The covered sequence is identical to the NCBI Reference Sequence: NP\_000614.1. B. Translation of the DNA sequence into an amino acid sequence. The myc-B<sub>2</sub>R construct is made by inserting 9 residues in the N-terminal region to reconstitute the 10-residue myc tag (underlined). C. Expression of hu B<sub>2</sub>R and of its myc-tagged variant in HEK 293a cells as measured by saturation curves of [<sup>3</sup>H]BK in cells (transfected with the indicated vector). Values are the mean of 2-3 values, each composed of duplicate determinations.

## A. Coding sequence inserted into the *rat myc-B<sub>2</sub>R* vector

```

ATGGAGCAGAAACTCATCTCAGAAGAGGATCTGATGTTCAACATCACCACGCAAGCCCTGGGGTCTGCT
CATAACGGGACCTTTTTCAGAGGTCAACTGCCAGACTGAGTGGTGGAGCTGGCTCAATGCCATCCAG
GCCCCCTTCTCTGGGTCTCTCCTGCTGGCCGCACTGGAGAACATCTTTGCTCCTCAGCGTGTCTGT
CTGCACAAAACCAACTGCACTGTGGCTGAGATCTACCTGGGCAACCTGGCAGCCGCGGACCTCATCCT
GGCCTGCGGATTACCCCTTCTGGGCCATCACCATCGCCAATAAATTGACTGGCTGTTGCGGAGAGGTGCT
GTGCCGCGTGGTGAATACCATGATCTACATGAACCTCTACAGCAGCATCTGCTTCTGATGCTTGTGAGT
ATCGACCGATACCTGGCGCTGGTGAAGACCATGTCCATGGGCCGGATGCGCGGGGTACGCTGGGCCA
AACTGTACAGCCTGGTGTGACTGTGAGCTGTACGCTGCTTCTGAGTTCACCCATGTTGGTGTTCAGGACCA
TGAAGGACTACAGGAAGAGGGCCACAACGTCACGGCCTGCGTCATTGTCTACCCGTCCTCCGCTCCTGG
GAGGTGTTACCAACATGCTGCTGAACCTGGTGGGTTTCTCCTACCCCTGAGTATCATCACCTTCTGCA
CGGTGCGAATCATGCAGGTGCTGAGGAACAACGAGATGAAGAAGTTCAAGGAGGTCCAGACGGAGAAG
AAGGCCACTGTGCTGGTGTGCTGGCTGTCCTGGGGCTCTTTGTGCTGTGTTGGTTTCTTTCCAGATCAGC
ACCTTCTGGACACGCTGCTGCGGCTTGGCGTGTGTCGGGATGCTGGAACGAGCGTGCCGTGGATAT
TGTCACCCAGATCAGTTCCCTACGTGGCCTATAGCAACAGCTGCCTCAACCCGCTGGTGTACGTGATTGT
GGGCAAGCGCTTCCGAAAGAAGTCCCGAGAGGTGTACCAGGCAATATGCCGGAAGGGAGGCTGCATG
GGAGAGTCCGTCCAGATGGAGAACTCCATGGGGACTCTGAGGACCTCTATCTCGTGGACCGGCAGAT
CCACAAGCTGCAGGATTGGGCGGGGAACAAGCAGTGA

```

## B. Translation

```

MEQKLISEEDL
MFNITTQALGSAHNGTFSEVNCNPDTEWWSWLNAIQAPFLWVLFLLAALLENIFVLSVFCLHKTNCTVAEIYLG
NLAAADLILACGLPFWAITIANNFDWLFGEVLCRVVNTMIYMNLYSSICFLMLVSIDRYLALVKTMMSGRMRG
VRWAKLYSLVIWSCTLLSSPMLVFRTMKDYREEGHNVTACVIVYPSRSWEVFTNMLLNLVGFLPLSIITFC
TVRIMQVLRNNEMKKFKEVQTEKKATVLVLAVLGLFVLCWFPFIQISTFLDTLRLGLVLSGCWNERAVDIVTQI
SSYVAYSNSCLNPLVYVIVGKRFRKKSREYVQAICRKGGCMGESVQMENSMGTLRTSISVDRQIHLQDWA
GNKQ

```

## C. Expression

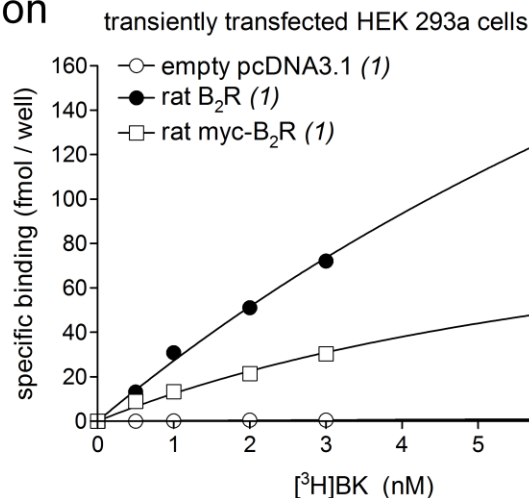

Supplementary figure 2. Validation of novel rat B<sub>2</sub>R vectors. A. Coding DNA sequence inserted into the rat B<sub>2</sub>R vector based on the pcDNA3.1 vector, as determined by post-hoc sequencing. The covered sequence is identical to the NCBI Reference Sequence: NP\_001257642. B. Translation of the DNA sequence into an amino acid sequence. Predicted transmembrane domains in boldface. The myc-B<sub>2</sub>R construct was made by inserting the 10-residue myc tag (underlined). C. Expression of rat B<sub>2</sub>R and of its myc-tagged variant in HEK 293a cells as measured by saturation curves of [<sup>3</sup>H]BK in cells (transfected with the indicated vector). Presentation as in Supplementary figure 1.
